# Supplementary material for: Signalling Network Construction for Modelling Plant Defence Response
Source: PLoS One. 2012 Dec 18;7(12):e51822. doi: 10.1371/journal.pone.0051822 (PMC3525666; doi:10.1371/journal.pone.0051822)
Supplement: Supporting Information S11 — The levels of the biological component abstraction. The first column in the table represents the family name of the biological component. The second column contains all the single members of the family that are considered important for the plant defence. The third column contains their unique ID numbers from the TAIR database while in the fourth column are all the synonyms for the component names. (XLS) [file pone.0051822.s011.xls]

## Sheet: Sheet1
Family name (level 2)	Individual short name (level 3)	TAIR gene ID	Synonyms
SA	SA	/	salicylic acid, Salicylate, o-Hydroxybenzoic acid
HRT	HRT	AT5G43470	HRT protein,Hypersensitive response to TCV, HYPERSENSITIVE RESPONSE TO TCV, MWF20.19, MWF20_19, RCY1, RECOGNITION OF PERONOSPORA PARASITICA 8, RESISTANT TO CMV(Y) 1, RPP8,DISEASE RESISTANCE PROTEIN RPP8
NPR1	NPR1	AT1G64280	NPR1 gene, NPR1 protein,ARABIDOPSIS NONEXPRESSER OF PR GENES 1, ATNPR1, F15H21.6, F15H21_6, NIM1, NON-INDUCIBLE IMMUNITY 1, NONEXPRESSER OF PR GENES 1, SAI1, SALICYLIC ACID INSENSITIVE 1
NIMIN	NIMIN1	AT1G02450	NIMIN1 gene, NIMIN1 protein, T6A9.23, NIM1-INTERACTING 1, NIMIN-1
NIMIN	NIMIN2	AT3G25882	NIM1-INTERACTING 2, NIMIN-2
NIMIN	NIMIN3	AT1G09415	NIM1-INTERACTING 3, NIMIN-3
PAD34	PAD4	AT3G52430	PAD4 gene, PAD4 protein,ARABIDOPSIS PHYTOALEXIN DEFICIENT 4, ATPAD4, F22O6.190, PHYTOALEXIN DEFICIENT 4
PAD34	PAD3	AT3G26830	CYP71B15,MDJ14.12,PAD3,PHYTOALEXIN DEFICIENT 3
EDS1	EDS1	AT3G48090	EDS1 gene, EDS1 protein,ATEDS1, T17F15.40,ENHANCED DISEASE SUSCEPTIBILITY 1
EDS5	EDS5	AT4G39030	EDS5 gene, SID1 gene, EDS5 protein, SID1 protein,SALICYLIC ACID INDUCTION DEFICIENT 1, F19H22.130, F19H22_130, ENHANCED DISEASE SUSCEPTIBILITY 5, SID1
PR125	PR1	AT2G14610	PR1 gene, PR1 protein,ATPR1, PR 1, T6B13_15, PATHOGENESIS-RELATED PROTEIN 1, PATHOGENESIS-RELATED GENE 1, T6B13.15, PR-1, PR-1a
PR125	PR2	AT3G57260	PR2 gene,PATHOGENESIS-RELATED PROTEIN 2, BGL2, BG2, BETA-1, 3-GLUCANASE 2, 3-GLUCANASE,PR-2,PR 2,F28O9.110
PR125	PR5	AT1G75040	PR5 protein,PR-5, PATHOGENESIS-RELATED PROTEIN 5, PATHOGENESIS-RELATED GENE 5,PR 5
ICS	ICS1	At1g74710	ICS1 gene,SID2 gene,EDS16 gene, ICS1 protein,SID2 protein,EDS16 protein, ENHANCED DISEASE SUSCEPTIBILITY TO ERYSIPHE ORONTII 16, AT1G74710.1, SALICYLIC ACID INDUCTION DEFICIENT 2, ISOCHORISMATE SYNTHASE, ISOCHORISMATE SYNTHASE 1, SID2, EDS16, F25A4.31,ICS 1,ATICS1,ICS-1,ARABIDOPSIS ISOCHORISMATE SYNTHASE 1, ENHANCED DISEASE SUSCEPTIBILITY TO ERYSIPHE ORONTII 16
ICS	ICS2	AT1G18870	ICS2 gene, ICS2 protein,F6A14_3, ISOCHORISMATE SYNTHASE 2, ATICS2,F6A14.3,ICS 2, ICS-2
WRKY70	WRKY70	At3g56400	WRKY70 gene, WRKY70 protein, WRKY DNA-binding protein 70, ARABIDOPSIS THALIANA WRKY DNA-BINDING PROTEIN 70,ATWRKY70
MPK4	MPK4	At4g01370	MPK4 gene, MPK4 protein,ATMPK4, ARABIDOPSIS THALIANA MAP KINASE 4, MAP KINASE 4, F2N1.1, F2N1_1
Chorismate	Chorismate	/	/
Isochorismate	Isochorismate	/	Iso-chorismic acid, Isochorismic acid
BA	BA	/	Benzoic acid, benzene carboxylic acid, benzoate, Benzeneformic acid, phenylformic acid
BA2H	BA2H	/	benzoic acid 2-hydroxylase
ROS_productive_enzymes	NADPH_oxidase	/	/
ROS_productive_enzymes	Catalase	/	CAT
ROS_productive_enzymes	Glutathione peroxidase	/	GSH peroxidase
ROS_productive_enzymes	Superoxide_dismutase	/	SOD
SAG	SAG	/	Salicylic acid glucoside, Salicylic acid beta-glucoside, salicylate glucoside, 2-O-b-D glucoside
SGE	SGE	/	Salicylic acid glucose ester, salicyloyl glucose ester
Trans-cinnamic_acid	Trans-cinnamic_acid	/	Cinnamic acid, trans-Cinnamate, trans-Cinnamic acid, (E)-Cinnamate
Phenylalanine	Phenylalanine	/	L-phenylalanine, 3-Phenylalanine, Phe
Phenylpyruvate	Phenylpyruvate	/	Phenylpyruvate,Phenylpyruvic acid, alpha-Ketohydrocinnamic acid,keto-Phenylpyruvate,3-Phenyl-2-oxopropanoate
ROS	ROS	/	reactive oxigen species,oxigen radicals, oxidative burst, h2o2, hydogen peroxide, H 2 O 2, O3, O2,O2-*
PAL	PAL1	AT2G37040	PAL1 gene, PAL1 protein,CI0004, T1J8.22, PHENYLALANINE AMMONIA LYASE 1,PHE AMMONIA LYASE 1, T1J8_22, PAL 1, PAL-1,ATPAL1
PAL	PAL2	AT3G53260	PAL2 gene, PAL2 protein, phenylalanine ammonia-lyase 2, T4D2.190, PAL 2, PAL-2, ATPAL2
PAL	PAL3	AT5G04230	PAL3 gene, PAL3 protein,F21E1.150, ATPAL3, PHENYL ALANINE AMMONIA-LYASE 3, F21E1_150, PAL 3, PAL-3
PAL	PAL4	AT3G10340	PAL4 gene,PAL4 protein,Phenylalanine ammonia-lyase 4, PAL 4, PAL-4,F14P13.6
IPL	IPL	/	IPL protein, isochorismate pyruvate lyase
CM	CM1	AT3G29200	ARABIDOPSIS THALIANA CHORISMATE MUTASE 1, ATCM1, CHORISMATE MUTASE 1, MXO21.4
CM	CM2	At5g10870	ATCM2, chorismate mutase 2
CM	CM3	At1g69370	ATCM3, chorismate mutase 3
Prephenate_aminotransferase	Prephenate_aminotransferase	At2G22250	/
Prephenate	Prephenate	/	Prephenic acid
Arogenate_dehydratase	Arogenate_dehydratase	At5g22630	ADT5, arogenate dehydratase 5, prephenate dehydratase
Orto-coumaric_acid	Orto-coumaric_acid	/	trans-2-Hydroxycinnamate, trans-2-Hydroxycinnamic acid, 2-Hydroxycinnamate, 2-Coumaric acid, o-Coumaric acid, 2-Coumarate
UGP_glikosyltransferaze	UGP_glikosyltransferaze	AT1G01420	UGT72B3, UDP-GLUCOSYL TRANSFERASE 72B3, UDP-glycosyltransferase, quercetin 3-O-glucosyltransferase
Ethylene	Ethylene	/	Ethene, Et
Copper	Copper	/	Cu,Cu2+
SAM	SAM	/	Sadenosyl methionine, S-Adenosyl methionine, S-adenosyl-L-methionine
ACC	ACC	/	1-aminocyclopropane-1-carboxylic-acid
ACS	ACS1	AT3G61510	ACS1 protein,ARABIDOPSIS THALIANA 1-AMINOCYCLOPROPANE-1-CARBOXYLATE SYNTHASE 1, 1-AMINOCYCLOPROPANE-1-CARBOXYLATE SYNTHASE 1, AT-ACS1, F2A19.110, ACC SYNTHASE 1
ACS	ACS2	AT1G01480	ACS2 protein, 1-Amino-cyclopropane-1-carboxylate synthase 2, 1-AMINOCYCLOPROPANE-1-CARBOXYLATE SYNTHASE, F22L4.4, AT-ACC2, EC 4.4.1.14, F22L4_4, S-ADENOSYL-L-METHIONINE METHYLTHIOADENOSINE-LYASE
ACS	ACS3	AT5G28360	ACS3 protein, F21B23.5, F21B23_5,1-F21B23.5, 1-AMINOCYCLOPROPANE-1-CARBOXYLATE SYNTHASE LIKE PSEUDOGENE
ACS	ACS4	AT2G22810	ACS4 protein, ATACS4, 1-AMINOCYCLOPROPANE-1-CARBOXYLATE SYNTHASE, T30L20.7, 1-AMINOCYCLOPROPANE-1-CARBOXYLATE SYNTHASE 4, 1-AMINOCYCLOPROPANE-1-CARBOXYLIC ACID SYNTHASE POLYPEPTIDE, ACC4
ACS	ACS5	AT5G65800	ACS5 protein, ETO2, CYTOKININ-INSENSITIVE 5, MPA24_15, ACC SYNTHASE 5, MPA24.15, ATACS5, CIN5, 1-AMINO-1-CYCLOPROPANECARBOXYLATE SYNTHASE, ETHYLENE OVERPRODUCER 2
ACS	ACS6	AT4G11280	ACS6 protein, F8L21.70, F8L21_70, 1-AMINOCYCLOPROPANE-1-CARBOXYLIC ACID (ACC) SYNTHASE 6, ATACS6
ACS	ACS7	AT4G26200	ACS7 protein, 1-AMINO-CYCLOPROPANE-1-CARBOXYLATE SYNTHASE 7, T25K17.10, T25K17_10, ATACS7
ACS	ACS8	AT4G37770	ACS8 protein,1-AMINO-CYCLOPROPANE-1-CARBOXYLATE SYNTHASE 8, T28I19.50, T28I19_50
ACS	ACS9	AT3G49700	ACS9 protein, ETO3, ETHYLENE OVERPRODUCING 3, 1-AMINOCYCLOPROPANE-1-CARBOXYLATE SYNTHASE 9, T16K5.50
ACS	ACS10	AT1G62960	ACS10 protein, F16P17_11, F16P17.11, ACC SYNTHASE 10
ACS	ACS11	AT4G08040	ACS11 protein, 1-AMINOCYCLOPROPANE-1-CARBOXYLATE SYNTHASE 11, T17A2_2, T17A2.2
ACO	ACO1	AT2G19590	ACO1 protein, F3P11_19, F3P11.19, ACC OXIDASE 1,ATACO1
ACO	ACO2	AT1G62380	ACO2 protein, ACC OXIDASE 2, F24O1.40, F24O1_40, ATACO2, ACC OXIDASE
ACO	ACO4	AT1G05010	ACO4 protein, ETHYLENE-FORMING ENZYME, T7A14.12, ethylene forming enzyme, EFE, 1-AMINOCYCLOPROPANE-1-CARBOXYLATE OXIDASE, 1-AMINOCYCLOPROPANE-1-CARBOXYLIC ACID OXIDASE, EAT1, T7A14_12
ACO	ACO	AT1G12010	F12F1.12, F12F1.12 protein,F12F1_12
ACO	ACO-like	AT1G77330	F2P24.4 protein,F2P24_4
RAN1	RAN1	AT5G44790	RAN1 protein,RESPONSIVE-TO-ANTAGONIST 1, K23L20_14, HMA7, K23L20.14
Et_receptor	ETR1	AT1G66340	ETR1 protein,EIN1, T27F4.9, ETHYLENE INSENSITIVE 1, HISTIDINE KINASE ETR1, ETHYLENE RESPONSE 1, T27F4_9, ETR
Et_receptor	ERS1	AT2G40940	ERS, ETHYLENE RESPONSE SENSOR, ETHYLENE RESPONSE SENSOR 1, T20B5.14, T20B5_14
Et_receptor	ETR2	AT3G23150	ETHYLENE RESPONSE 2, K14B15.9
Et_receptor	ERS2	AT1G04310	ETHYLENE RESPONSE SENSOR 2, F19P19.25, F19P19_25
Et_receptor	EIN4	AT3G04580	ETHYLENE INSENSITIVE 4, F7O18.5, F7O18_5
CTR1	CTR1	AT5G03730	CTR1 protein,SUGAR-INSENSITIVE 1, SERINE/THREONINE-PROTEIN KINASE CTR1, SIS1, F17C15_150, F17C15.150,AT5G03730.1, CONSTITUTIVE TRIPLE RESPONSE 1
EIN2	EIN2	AT5G03280	EIN2 protein,PIR2, F12E4_10, ERA3, ORESARA 2, ATEIN2, CYTOKININ RESISTANT 1, F12E4.10, ETHYLENE INSENSITIVE 2, ORE3, CKR1, ENHANCED RESPONSE TO ABA3, ORESARA 3, ORE2
EIN3EIL1EIL2	EIN3	AT3G20770	EIN3 protein,ETHYLENE-INSENSITIVE3, MOE17.4
EIN3EIL1EIL2	EIL1	AT2G27050	ATEIL1, ETHYLENE-INSENSITIVE3-LIKE 1, T20P8.10, T20P8_10
EIN3EIL1EIL2	EIL2	AT5G21120	ETHYLENE-INSENSITIVE3-LIKE 2, T10F18.150, T10F18_150
ERFEDF	ERF1	AT3G23240	ERF1 gene, ERF1 protein,ETHYLENE RESPONSE FACTOR 1, ATERF1, K14B15.4
ERFEDF	EDF1	AT1G25560	EDF1 gene, EDF1 protein,TEM1, F2J7.3, F2J7_3, TEMPRANILLO 1, TEM1, ETHYLENE RESPONSE DNA BINDING FACTOR 1
ERFEDF	EDF2	AT1G68840	EDF2 gene,EDF2 protein,RAV2, TEM2, ATRAV2, RAP2.8, T6L1.3, T6L1_3, TEMPRANILLO 2, RELATED TO AP2 8, ETHYLENE RESPONSE DNA BINDING FACTOR 2, REGULATOR OF THE ATPASE OF THE VACUOLAR MEMBRANE
ERFEDF	EDF3	AT3G25730	EDF3 gene, EDF3 protein,K13N2.14, ETHYLENE RESPONSE DNA BINDING FACTOR 3
ERFEDF	EDF4	AT1G13260	EDF4 gene, EDF4 protein,RAV1, T6J4.2, T6J4_2, RELATED TO ABI3/VP1 1, ETHYLENE RESPONSE DNA BINDING FACTOR 4
EBF1EBF2	EBF1	AT2G25490	EBF1 gene, EBF1 protein,F13B15.15, FBL6, F13B15_15, EIN3-BINDING F BOX PROTEIN 1
EBF1EBF2	EBF2	AT5G25350	EBF2 gene, EBF2 protein,EIN3-BINDING F BOX PROTEIN 2, F18G18.90, F18G18_90, EBF1/2
EIN5	EIN5	AT1G54490	EIN5 protein, EXORIBONUCLEASE 4, ACC INSENSITIVE 1, F20D21.30, ETHYLENE INSENSITIVE 5, ATXRN4, AIN1, F20D21_30, XRN4
JA	JA	/	Jasmonic acid, (-)-Jasmonic acid, Jasmonate, 2-(3-oxo-2-((Z)-pent-2-enyl)cyclopentane)acetic acid
Linolenic_acid	Linolenic_acid	/	/
LOX	LOX1	AT1G55020	LOX1 protein,Lipoxygenase 1, LIPOXYGENASE, ATLOX1,LOX 1, LOX-1, ARABIDOPSIS LIPOXYGENASE 1
LOX	LOX2	AT3G45140	LOX2 protein,ARABIODOPSIS THALIANA LIPOXYGENASE 2, ATLOX2, LIPOXYGENASE 2, LOX 2, LOX-2, T14D3.80
LOX	LOX3	AT1G17420	LOX3 protein,F28G4.10,LOX 3, LOX-3, LIPOXYGENASE 3
LOX	LOX4	AT1G72520	ARABIDOPSIS THALIANA LIPOXYGENASE 4, ATLOX4, LIPOXYGENASE 4, LOX4, T10D10.1, T10D10_1
LOX	LOX5	AT3G22400	ARABIDOPSIS THALIANA LIPOXYGENASE 5, ATLOX5, MCB17.13
LOX	LOX6	AT1G67560	ARABIDOPSIS THALIANA LIPOXYGENASE 6, ATLOX6, F12B7.11, F12B7_11, LIPOXYGENASE 6
AOS	AOS	AT5G42650	AOS protein,CYP74A, DELAYED DEHISCENCE 2, DDE2, ALLENE OXIDE SYNTHASE, CYTOCHROME P450 74A
AOC	AOC1	AT3G25760	AOC1 protein,EARLY-RESPONSIVE TO DEHYDRATION 12, ALLENE OXIDE CYCLASE 1, ERD12, AOC 1, AOC-1
AOC	AOC2	AT3G25770	AOC2 protein,ALLENE OXIDE CYCLASE 2, AOC 2, AOC-2,K13N2.11
AOC	AOC3	AT3G25780	AOC3 protein,ALLENE OXIDE CYCLASE 3, K13N2.12, AOC 3, AOC-3
AOC	AOC4	AT1G13280	AOC4 protein,ALLENE OXIDE CYCLASE 4, T6J4_4, T6J4.4,AOC 4, AOC-4
13-HPT	13-HPT	/	13-HPOT, 13(S)-hydroperoxy linolenic acid
12/13_EDT	12/13_EDT	/	allene oxide
OPDA	OPDA	/	12-OPDA, phytodienoic acid,12-oxophytodienoic acid
JMT	JMT	AT1G19640	JMT protein,F14P1_3, JASMONIC ACID CARBOXYL METHYLTRANSFERASE, F14P1.3
JA-Ile	JA-Ile	/	JA-isoleucine, Jasmonate-isoleucine, N-[(1R,2R)-3-oxo-2-(2-(Z)-pentenyl)cyclopentane-1-acetyl]-(2S,3S))-isoleucine
COI1	COI1	AT2G39940	COI1 protein,T28M21_10, T28M21.10, CORONATINE INSENSITIVE 1
JAR1	JAR1	AT2G46370	JAR1 protein,JASMONATE RESISTANT 1, FIN219, F11C10.6, FAR-RED INSENSITIVE 219
JAZ	JAZ1	AT1G19180	JAZ1 gene, JAZ1 protein, T29M8_5, T29M8.5, TIFY10A, JASMONATE-ZIM-DOMAIN PROTEIN 1
JAZ	JAZ2	AT1G74950	F25A4.8, F25A4_8, JASMONATE-ZIM-DOMAIN PROTEIN 2, TIFY10B
JAZ	JAZ3	At3g17860	JAZ3 protein, JASMONATE-ZIM-DOMAIN PROTEIN 3, JAI3, JASMONATE-INSENSITIVE 3, TIFY6B
JAZ	JAZ4	AT1G48500	JASMONATE-ZIM-DOMAIN PROTEIN 4, T1N15.11, T1N15_11, TIFY DOMAIN PROTEIN 6A, TIFY6A
JAZ	JAZ5	AT1G17380	F28G4.16, JASMONATE-ZIM-DOMAIN PROTEIN 5, TIFY11A
JAZ	JAZ6	AT1G72450	JASMONATE-ZIM-DOMAIN PROTEIN 6, T10D10.8, T10D10_8, TIFY DOMAIN PROTEIN 11B, TIFY11B
JAZ	JAZ7	AT2G34600	JASMONATE-ZIM-DOMAIN PROTEIN 7, T31E10.6, T31E10_6, TIFY5B
JAZ	JAZ8	AT1G30135	JASMONATE-ZIM-DOMAIN PROTEIN 8, TIFY5A
JAZ	JAZ9	AT1G70700	F5A18.12, F5A18_12, JASMONATE-ZIM-DOMAIN PROTEIN 9, TIFY7
JAZ	JAZ10	AT5G13220	JAS1, JASMONATE-ASSOCIATED 1, JASMONATE-ZIM-DOMAIN PROTEIN 10, T31B5.40, T31B5_40, TIFY DOMAIN PROTEIN 9, TIFY9
JAZ	JAZ11	AT3G43440	JASMONATE-ZIM-DOMAIN PROTEIN 11, T18D12.10, TIFY3A
JAZ	JAZ12	AT5G20900	F22D1.70, F22D1_70, JASMONATE-ZIM-DOMAIN PROTEIN 12, TIFY3B
MYC2	MYC2	AT1G32640	MYC2 gene, MYC2 protein,F6N18_4, JIN1, ZBF1, JASMONATE INSENSITIVE 1, F6N18.4, ATMYC2, JAI1, RD22BP1, MYC2 TF
GST1b-CHIPR4	GST1	AT1G02930	ARABIDOPSIS GLUTATHIONE S-TRANSFERASE 1, ARABIDOPSIS THALIANA GLUATIONE S-TRANSFERASE F3, ATGST1, ATGSTF3, ATGSTF6, EARLY RESPONSIVE TO DEHYDRATION 11, ERD11, F22D16.7, F22D16_7, GLUTATHIONE S-TRANSFERASE, GLUTATHIONE S-TRANSFERASE 1, GLUTATHIONE S-TRANSFERASE 6, GSTF6
GST1b-CHIPR4	PR4	AT3G04720	HEL, HEL protein, PR-4, HEVEIN-LIKE, F7O18_21, F7O18.21, PATHOGENESIS-RELATED 4,PR 4
GST1b-CHIPR4	b-CHI	AT3G12500	b-CHI protein, basic chitinase, PATHOGENESIS-RELATED 3, PR3, PR-3, CHI-B, T2E22.18, ARABIDOPSIS THALIANA BASIC CHITINASE, PR 3, ATHCHIB
PDF1.2	PDF1.2	AT5G44420	PDF1.2 protein,LCR77, PDF1.2a, PLANT DEFENSIN 1.2, MFC16.8, MFC16_8, PLANT DEFENSIN 1.2A, Low-molecular-weight cysteine-rich 77
MPK6	MPK6	At2g43790	MPK6 protein,F18O19.10, MAP KINASE 6, ATMPK6, ARABIDOPSIS THALIANA MAP KINASE 6, MAPK6
MPK3	MPK3	AT3G45640	MPK3 protein, ATMPK3, T6D9.4, ATMAPK3, MITOGEN-ACTIVATED PROTEIN KINASE 3
THI2.1JR1VSP1CLH1	THI2.1	AT1G72260	THI2.1 protein,THIONIN 2.1, THI2.1.1
THI2.1JR1VSP1CLH1	JR1	AT3G16470	JASMONATE RESPONSIVE 1, T2O4.6
THI2.1JR1VSP1CLH1	VSP1	AT5G24780	ATVSP1, T4C12.50, VEGETATIVE STORAGE PROTEIN 1
THI2.1JR1VSP1CLH1	CLH1	AT1G19670	ATCLH1, ARABIDOPSIS THALIANA CORONATINE-INDUCED PROTEIN 1, ATHCOR1, CORI1, CORONATINE-INDUCED PROTEIN 1, F6F9.28, F6F9_28
TGA_TF245	TGA_TF2	At5g06950	TGA TF2 protein, AHBP-1B, MOJ9.12, MOJ9_12, TGA2
TGA_TF245	TGA_TF4	At5g10030	TGA TF4 protein,OBF4, OCS BINDING ELEMENT 4, T31P16.20, T31P16_20, OCS ELEMENT BINDING FACTOR 4, OCTOPINE SYNTHASE ELEMENT-BINDING PROTEIN, TGACG MOTIF-BINDING FACTOR 4, TGA4
TGA_TF245	TGA_TF5	At5g06960	TGA TF5 protein,OCS-ELEMENT BINDING FACTOR 5, TGA5, MOJ9.13, MOJ9_13, TGACG MOTIF-BINDING FACTOR 5, OBF5
OPCL1ACXAIM1KAT	OPCL1	AT1G20510	F5M15.17, F5M15_17, OPC-8:0 COA LIGASE1
OPCL1ACXAIM1KAT	ACX1	AT4G16760	ATACX1, DL4405C, FCAALL.119, ACYL-COA OXIDASE 1, ACYL-COA OXIDASE, acyl-CoA synthetase
OPCL1ACXAIM1KAT	ACX2	AT5G65110	ACYL-COA OXIDASE 2, ATACX2
OPCL1ACXAIM1KAT	ACX3	AT1G06290	ACYL-COA OXIDASE 3, ATACX3, T2D23.1
OPCL1ACXAIM1KAT	ACX4	AT3G51840	ACYL-COA OXIDASE 4, ATEM1.9, ATG6, ATSCX
OPCL1ACXAIM1KAT	ACX5	AT2G35690	ACYL-COA OXIDASE 5, T20F21.12, T20F21_12
OPCL1ACXAIM1KAT	ACX6	AT1G06310	ACYL-COA OXIDASE 6, T2D23.2, T2D23_2
OPCL1ACXAIM1KAT	AIM1	AT4G29010	F19B15.40, F19B15_40, ABNORMAL INFLORESCENCE MERISTEM
OPCL1ACXAIM1KAT	KAT1	AT1G04710	3-KETO-ACYL-COA THIOLASE 1, KAT1, PEROXISOMAL 3-KETOACYL-COA THIOLASE 4, PKT4, T1G11.4, T1G11_4
OPCL1ACXAIM1KAT	KAT2	AT2G33150	PED1, PKT3, PEROXISOME DEFECTIVE 1, 3-KETOACYL-COA THIOLASE 2, PEROXISOMAL 3-KETOACYL-COA THIOLASE 3
OPCL1ACXAIM1KAT	KAT5	AT5G48880	3-KETO-ACYL-COENZYME A THIOLASE 5, K24G6.22, K24G6_22, PEROXISOMAL 3-KETO-ACYL-COA THIOLASE 2, PEROXISOMAL-3-KETO-ACYL-COA THIOLASE 1, PKT1, PKT2
ACXAIM1KAT	ACX1	AT4G16760	ATACX1, DL4405C, FCAALL.119, ACYL-COA OXIDASE 1, ACYL-COA OXIDASE, acyl-CoA synthetase
ACXAIM1KAT	ACX2	AT5G65110	ACYL-COA OXIDASE 2, ATACX2
ACXAIM1KAT	ACX3	AT1G06290	ACYL-COA OXIDASE 3, ATACX3, T2D23.1
ACXAIM1KAT	ACX4	AT3G51840	ACYL-COA OXIDASE 4, ATEM1.9, ATG6, ATSCX
ACXAIM1KAT	ACX5	AT2G35690	ACYL-COA OXIDASE 5, T20F21.12, T20F21_12
ACXAIM1KAT	ACX6	AT1G06310	ACYL-COA OXIDASE 6, T2D23.2, T2D23_2
ACXAIM1KAT	AIM1	AT4G29010	F19B15.40, F19B15_40, ABNORMAL INFLORESCENCE MERISTEM
ACXAIM1KAT	KAT1	AT1G04710	3-KETO-ACYL-COA THIOLASE 1, KAT1, PEROXISOMAL 3-KETOACYL-COA THIOLASE 4, PKT4, T1G11.4, T1G11_4
ACXAIM1KAT	KAT2	AT2G33150	PED1, PKT3, PEROXISOME DEFECTIVE 1, 3-KETOACYL-COA THIOLASE 2, PEROXISOMAL 3-KETOACYL-COA THIOLASE 3
ACXAIM1KAT	KAT5	AT5G48880	3-KETO-ACYL-COENZYME A THIOLASE 5, K24G6.22, K24G6_22, PEROXISOMAL 3-KETO-ACYL-COA THIOLASE 2, PEROXISOMAL-3-KETO-ACYL-COA THIOLASE 1, PKT1, PKT2
OPR3	OPR3	AT2G06050	DDE1, ATOPR3, F5K7.19, F5K7_19, DELAYED DEHISCENCE 1, OXOPHYTODIENOATE-REDUCTASE 3
OPC8	OPC8	/	3-oxo-2-(cis-2'-pentenyl)-cyclopentane-1-octanoate, 3-oxo-2-(cis-2'-pentenyl)-cyclopentane-1-octanoic acid, oxopentenyl-cyclopentane-octanoic acid, 8-[(1R,2R)-3-oxo-2-{(Z)-pent-2-enyl}cyclopentyl]octanoate
Me-JA	Me-JA	/	MeJa, methyl jasmonate, MJ
OPC6	OPC6	/	3-oxo-2-(2-(Z)-pentenyl)cyclopentane-1-hexanoic acid, 3-oxo-2-(2-(Z)-pentenyl)cyclopentane-1-hexanoat
OPC4	OPC4	/	3-oxo-2-(2'-[Z]-pentenyl)cyclopentane-1-butanoat, 3-oxo-2-(2'-[Z]-pentenyl)cyclopentane-1-butanoic acid, 3-oxo-2-(2-(Z)-pentenyl)cyclopentane-1-butyric acid
OPC-8:0-CoA	OPC-8:0-CoA	/	OPC-8:0-CoA, oxopentenyl-cyclopentane-octanoyl-CoA, 8-[(1R,2R)-3-oxo-2-{(Z)-pent-2-enyl}cyclopentyl]octanoyl-CoA, OPC-8:0-CoA, 3-oxo-2-(cis-2'-pentenyl)-cyclopentane-1-octanoyl-CoA
SAM	SAM1	AT1G02500	ATSAM1, MAT1, METK1, S-ADENOSYLMETHIONINE SYNTHETASE 1, S-ADENOSYLMETHIONINE SYNTHETASE-1, SAM-1, SAM1, T14P4.17, T14P4_17
SAM	SAM2	AT4G01850	ATSAM2, MAT2, S-ADENOSYLMETHIONINE SYNTHETASE 2, SAM-2, SAM2, T7B11.11, T7B11_11
SAM	MAT3	AT2G36880	METHIONINE ADENOSYLTRANSFERASE 3, T1J8.6, T1J8_6
SAM	MAT4	AT3G17390	METHIONINE ADENOSYLTRANSFERASE 4, METHIONINE OVER-ACCUMULATOR 3, MGD8.26, MTO3, S-ADENOSYLMETHIONINE SYNTHETASE 3, SAMS3
SCF	SCF		Skp1-Cullin-F-box
AAO4	AAO4	AT1g04580	arabidopsis aldehide oxidase 4
L-methionine	L-methionine	/	/
